# Supplementary material
Source: Research Square preprint supplement (doi:10.21203/rs.3.rs-9663762/v1)
Supplement: Supplementary file 1 [file 1624812fa049d9713bf00b1d.docx]

**Diosgenin-loaded DSPE-PEG liposomes suppress high-fat induced pancreatic cancer cell growth by modulating lipid metabolism and apoptosis**

**Na Song1,2, Yue Wu3, Yongcan Wu4, Xuekuan Huang1*, Jianwei Wang1,4***

1. **Chongqing Key Laboratory of Traditional Chinese Medicine for Prevention and Cure of Metabolic Diseases, College of Traditional Chinese Medicine, Chongqing Medical University, Chongqing, China, 400016**
2. **Department of Oncology, Chongqing Traditional Chinese Medicine Hospital, Chongqing, China, 400021**
3. **Department of Gastroenterology, Chongqing Traditional Chinese Medicine Hospital, Chongqing, China, 400021**
4. **Chongqing Key Laboratory of Traditional Chinese Medicine for Prevention and Cure of Metabolic Diseases, College of Traditional Chinese Medicine, Chongqing University of Chinese Medicine, Chongqing, China, 402760**

**Corresponding Authors: Xuekuan Huang and Jianwei Wang.**

**Email:** xkhuang2002@163.com (X.Huang);wangjianwei@cqmu.edu.cn **(J.Wang).**

| 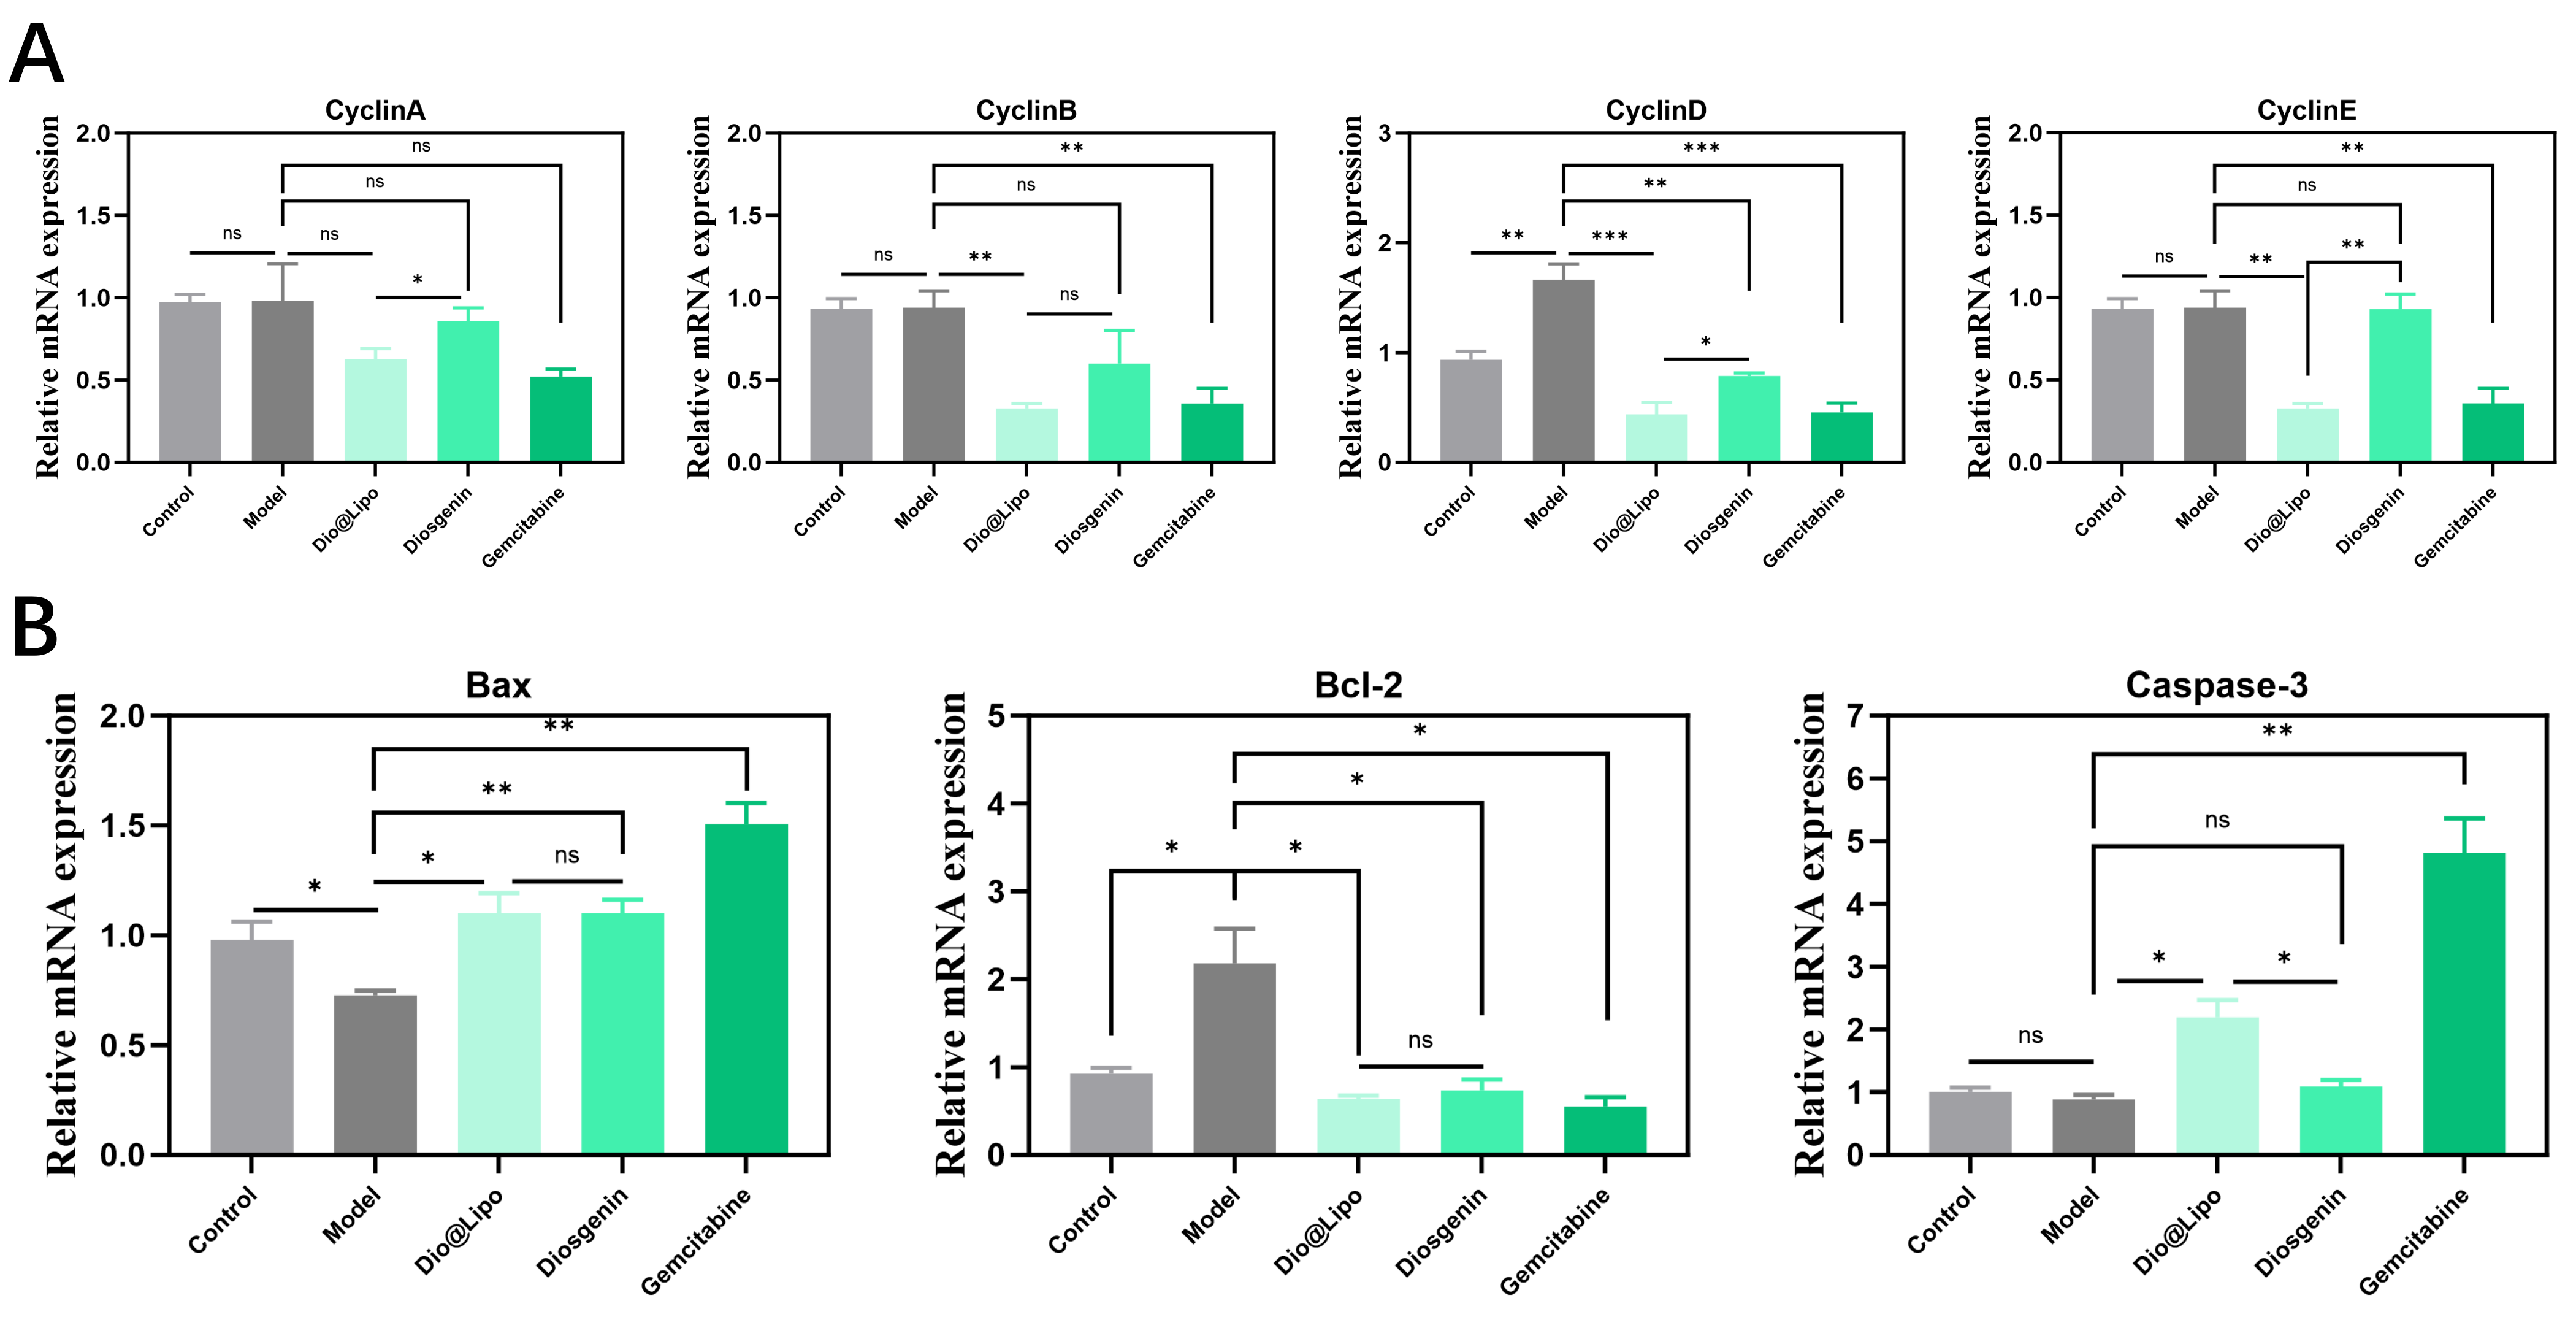 |
| --- |
| **Supplementary Figure S1. qRT-PCR analysis of cell-cycle- and apoptosis-related genes in SW1990 cells under high-fat conditions.**   1. Relative mRNA expression levels of cell-cycle-related genes, including CyclinA, CyclinB, CyclinD, and CyclinE, in different treatment groups. 2. Relative mRNA expression levels of apoptosis-related genes, including Bax, Bcl-2, and Caspase-3. Gene expression levels were calculated using the 2^-ΔΔCt method and normalized to the Control group.   Data are presented as mean ± SD (n = 3). ns, not significant; *P < 0.05; **P < 0.01; ***P < 0.001. |
